# Supplementary material for: A simple recipe for the non-expert bioinformaticist for building experimentally-testable hypotheses for proteins with no known homologs
Source: Springer Nature journal article supplement (doi:10.1007/s10969-012-9141-7), 2012-09-06
Supplement: MOESM5 [file 10969_2012_9141_MOESM5_ESM.doc]

| 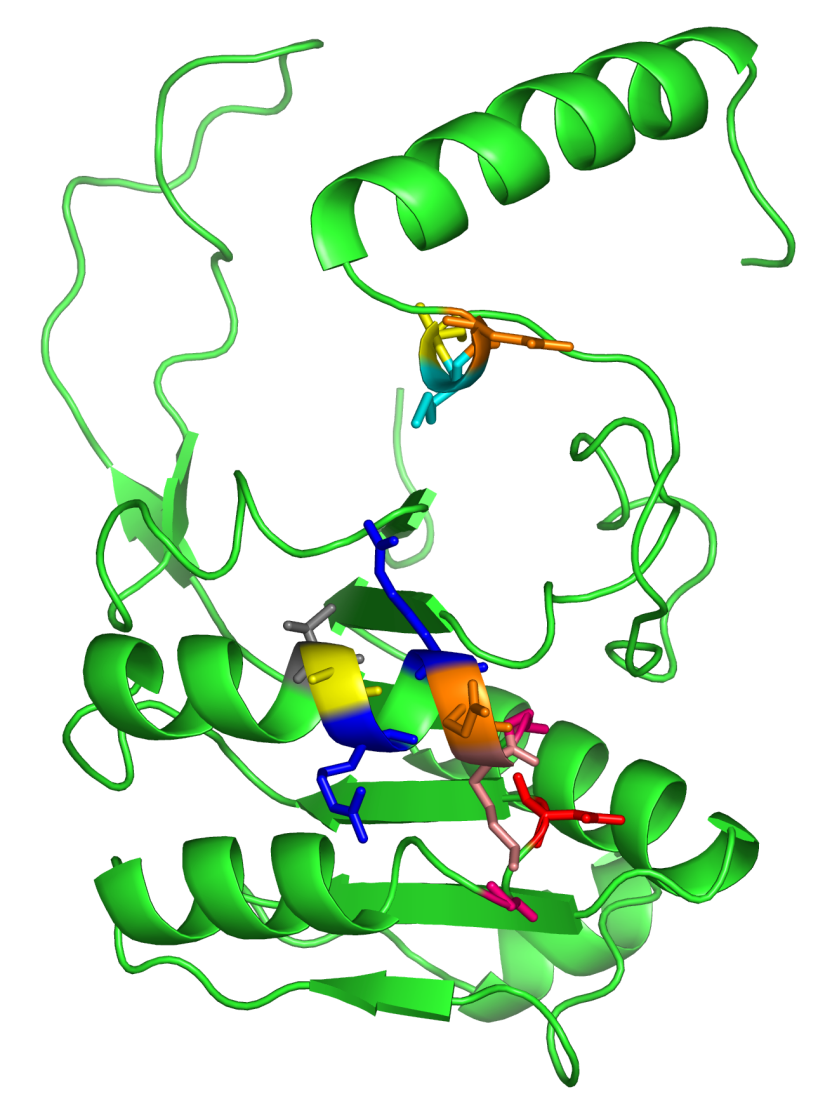 |
| --- |

**FigureS5: Predicted DNA-binding sites on the surface of *Mtb* ImuA’**

DNA-binding residues predicted using the program DISPLAR are labelled on the structural model for *Mtb* ImuA’. A total of 12 DNA-binding residues were predicted: Arg148, Val144, Ala145, Arg146, Gln149, Lys150, Gly151, Met25, Ala26, Gly122, Asp124 and Gln24. The residues are colour-coded as follows: (a) Arg146 and Arg148 are shown in blue. Arg146 is on the left with the side chain pointing down and Arg148 is on the right with the side chain pointing up, (b) Ala145 and Ala26 are in yellow. Ala145 is on the same helix as Arg146 and Arg148, (c) Asp124 is in red, (d) Gly122 and Gly151 are in hot-pink. Gly122 is below Asp124 (red), (e) Val144 is in grey, (f) Lys150 is in salmon, (g) Met25 is in cyan and (h) Gln149 and Gln24 are in orange. Gln149 is on the same helix as Arg146 and Arg148. The image was rendered in pymol ([www.pymol.org](http://www.pymol.org/)).
